# Supplementary material for: Observation of roton-like dispersion relations in acoustic metamaterials
Source: Research Square preprint supplement (doi:10.21203/rs.3.rs-841816/v1), 2021-08-30
Supplement: Supplementary file 2 [file 70fce5b98707bde3cd9b02fa.docx]

. (1)

where *m* is the mass, is the acceleration of the mass displacement *un* at lattice site , and *KN* is the spring constant representing *N*th-nearest-neighbour interactions, with *N*=3 in our case (see details in Methods). The corresponding dispersion relation is

. (2)

By fitting our measured dispersion relation to Eq. (2), we obtain *k1*=198 *N/m*, *k*3=454 *N/m*, and *m*=2.59*10-5 *kg* for our experimental sample. The fitted curve is shown in Fig. S1, which is consistent with our measured result.
